# Supplementary material for: Nitro-functionalized metal–organic frameworks with catalase mimic properties for glutathione detection
Source: Royal Society of Chemistry journal article supplement (doi:10.1039/c9an00813f), 2019-01-01
Supplement: c9an00813f1.pdf [file c9an00813f1.pdf]

## Supporting Information

### **Nitro-functionalized Metal–organic Frameworks with Catalase Mimic Properties for Glutathione Detection**

**Jiayan Wang,<sup>ab</sup> Wenying Li,<sup>a\*</sup> Yue-Qing Zheng<sup>a\*</sup>**

<sup>a</sup>Chemistry Institute for Synthesis and Green Application, School of Materials Science and  
Chemical Engineering, Ningbo University, Ningbo 315211, Zhejiang, PR China.

<sup>b</sup>Medical School, Ningbo University, Ningbo 315211, Zhejiang, PR China.

\*Corresponding author:

Email: liwenying@nbu.edu.cn (W. Li), zhengyueqing@nbu.edu.cn (Y-Q. Zheng)

Fax: +86-574-87600789

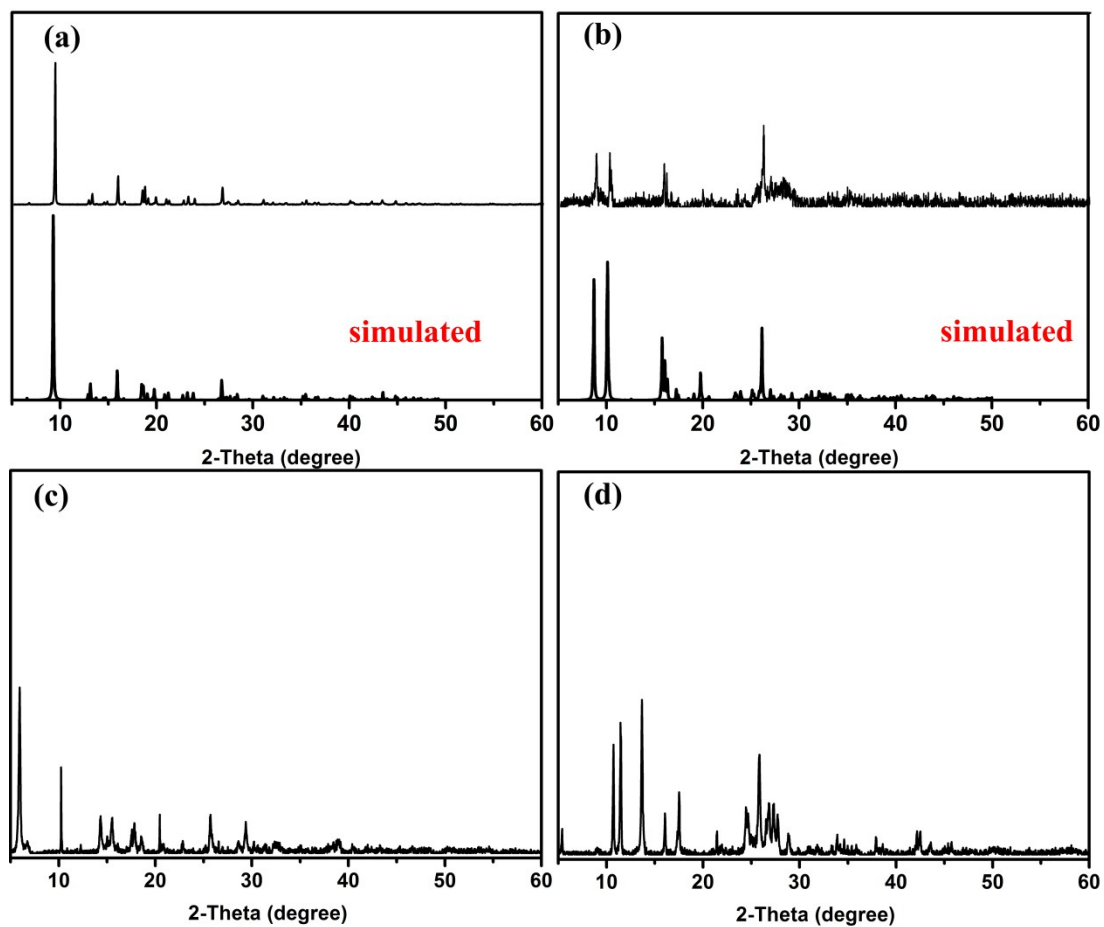

**Figure S1.** XRD patterns of (a) Cu-MOFs (i), (b) Cu-MOFs (ii), (c) Cu-MOFs (iii), (d) Cu-MOFs (iv).

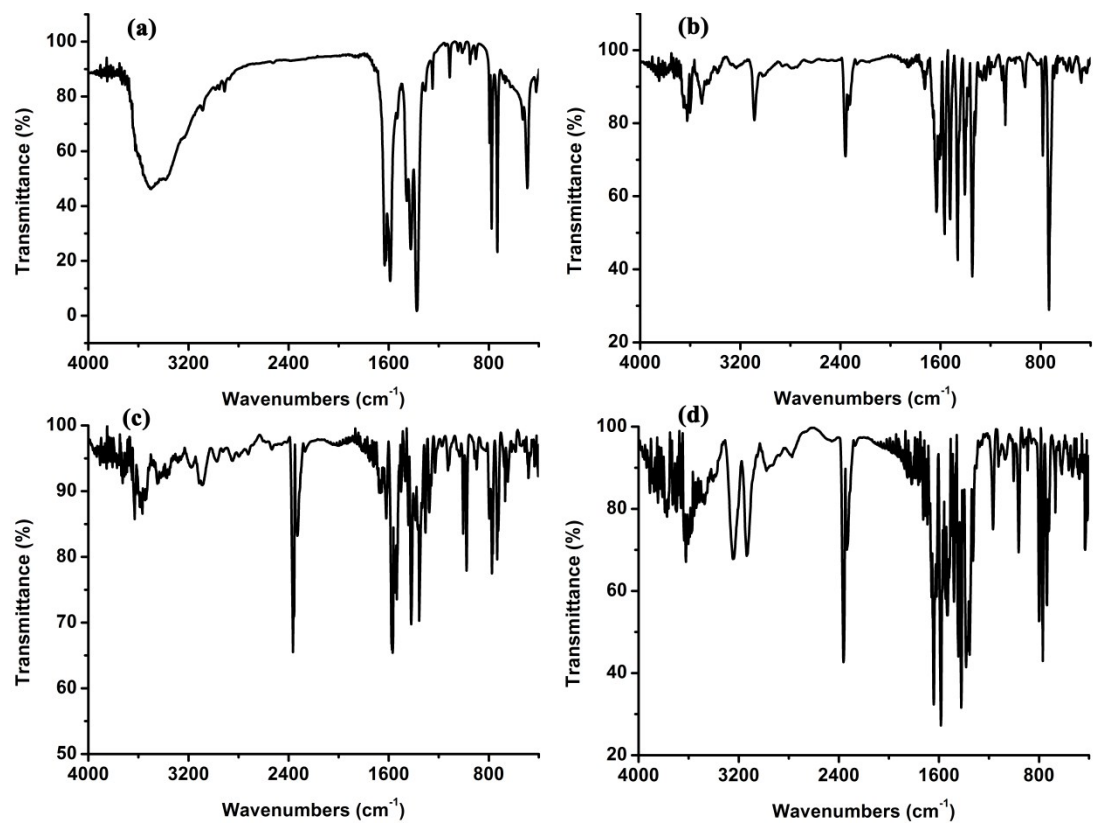

**Figure S2.** FTIR spectrum of (a) Cu-MOFs (i), (b) Cu-MOFs (ii), (c) Cu-MOFs (iii), (d) Cu-MOFs (iv).

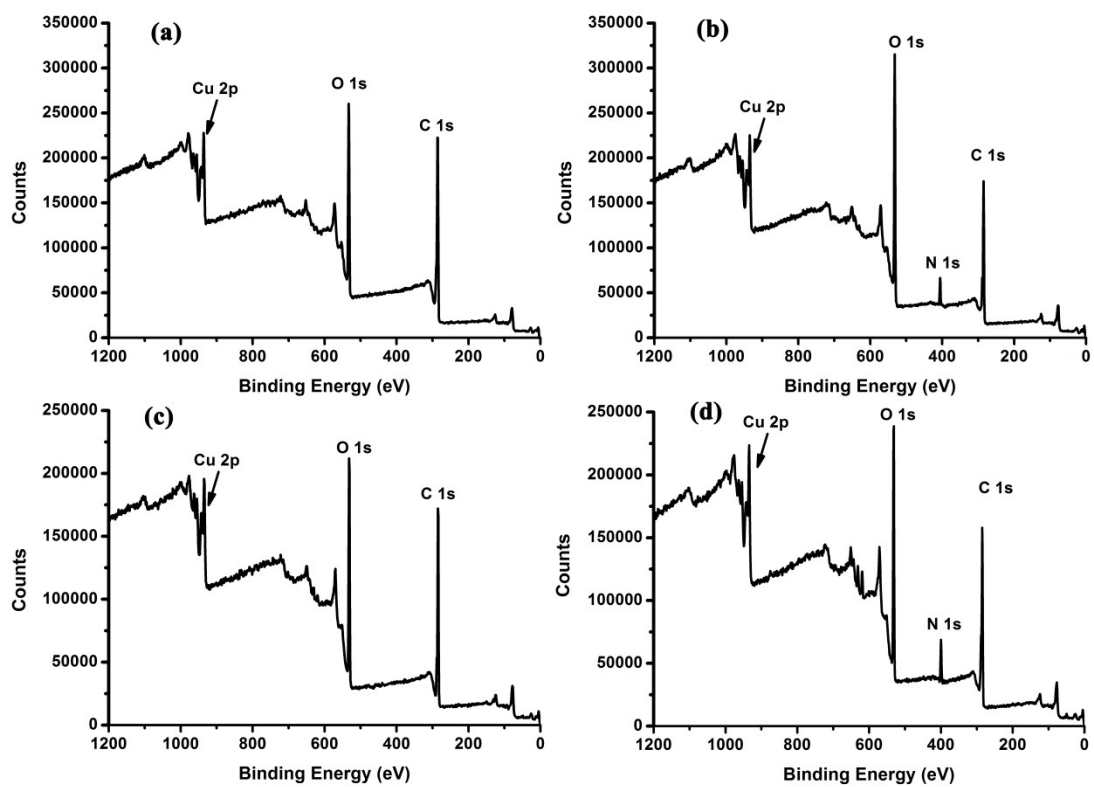

**Figure S3.** Survey XPS (a) Cu-MOFs (i), (b) Cu-MOFs (ii), (c) Cu-MOFs (iii), (d) Cu-MOFs (iv).

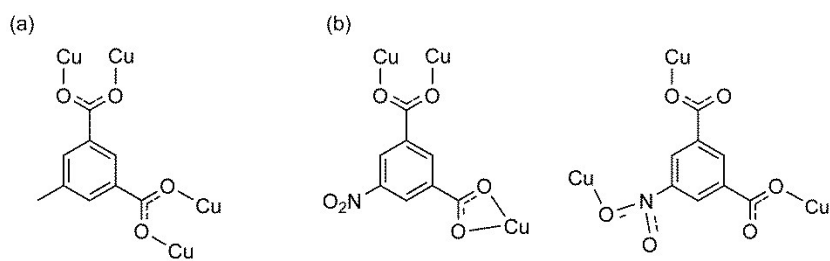

**Figure S4** Coordination Modes of ligand i (a) and ligand ii (b) with  $\text{Cu}^{2+}$ .

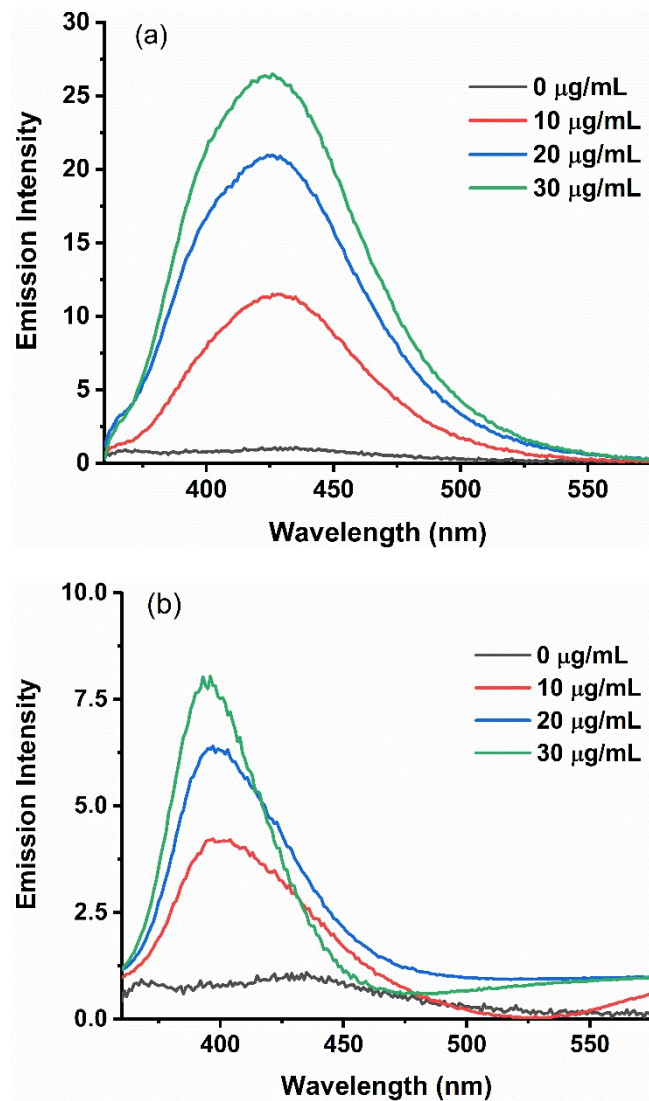

**Figure S5.** Effects of (a) Cu-MOFs (i) and (b) Cu-MOFs (iv) on the changes of hydroxyl radicals with terephthalic acid as the fluorescence probe. Assay conditions: 5  $\mu\text{M}$  terephthalic acid, 4 mM  $\text{H}_2\text{O}_2$ , pH 7.0, 5 min. The emission intensity of Cu-MOFs (iv) itself was subtracted.

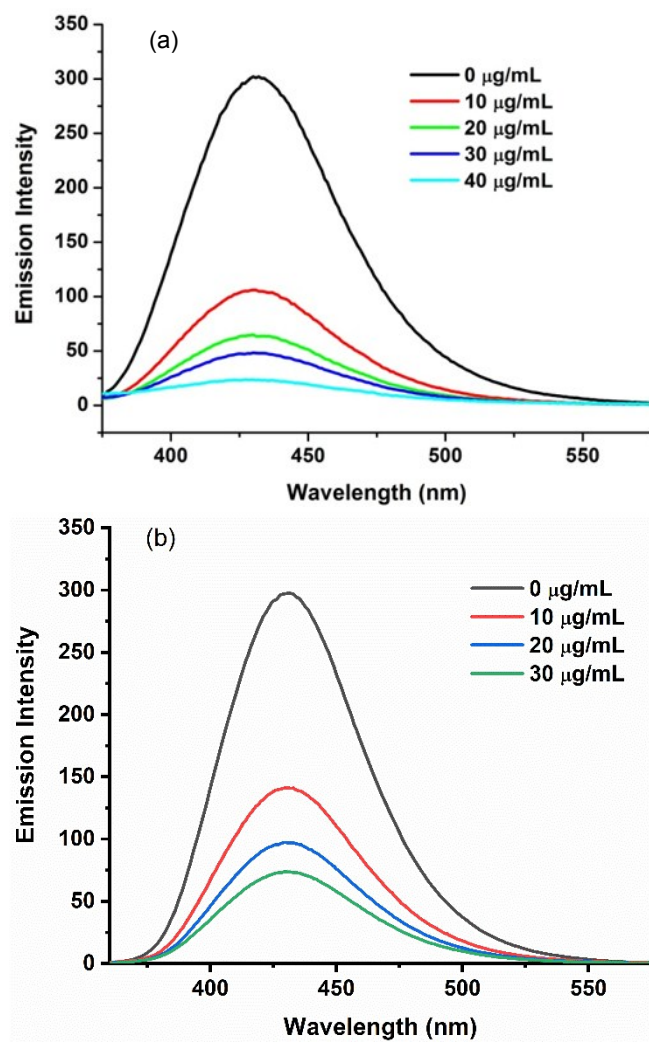

**Figure S6.** Effects of (a) Cu-MOFs (ii) or (b) Cu-MOFs (iii) on the changes of hydroxyl radicals with terephthalic acid as the fluorescence probe. Assay conditions: 5 µM terephthalic acid, 4 mM H<sub>2</sub>O<sub>2</sub>, pH 7.0, 5 min.

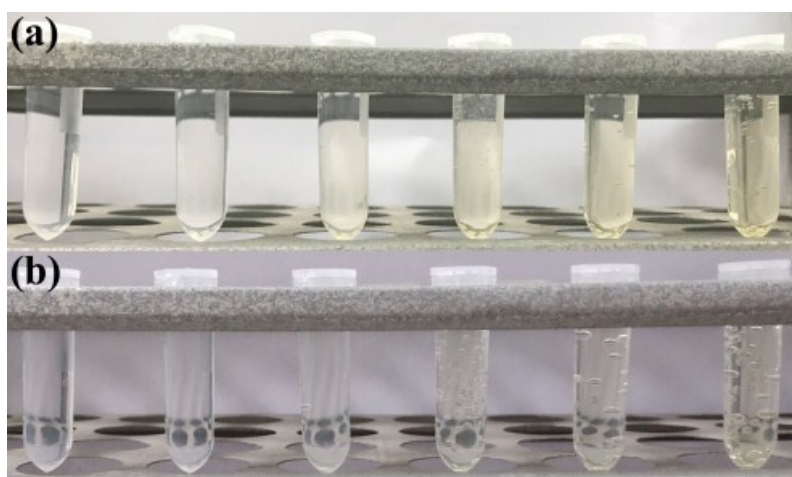

**Figure S7.** Photograph of gas bubble generated by the decomposition of  $\text{H}_2\text{O}_2$  in pH 7.0. (a) Reaction for 30 minutes. (b) Reaction for 60 minutes. From left to right, the concentrations of Cu-MOFs (ii) were 0, 10, 20, 30, 40 and 50  $\mu\text{g}/\text{mL}$  respectively.

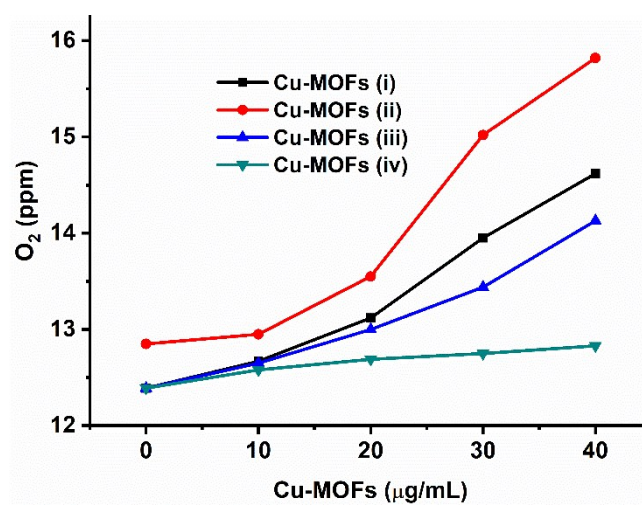

**Figure S8.** Effect of Cu-MOFs (ii) concentration on the generation of  $\text{O}_2$  by the decomposition of  $\text{H}_2\text{O}_2$ . Assay conditions: 4 mM  $\text{H}_2\text{O}_2$  and different concentrations of Cu-MOFs (pH 7.0).

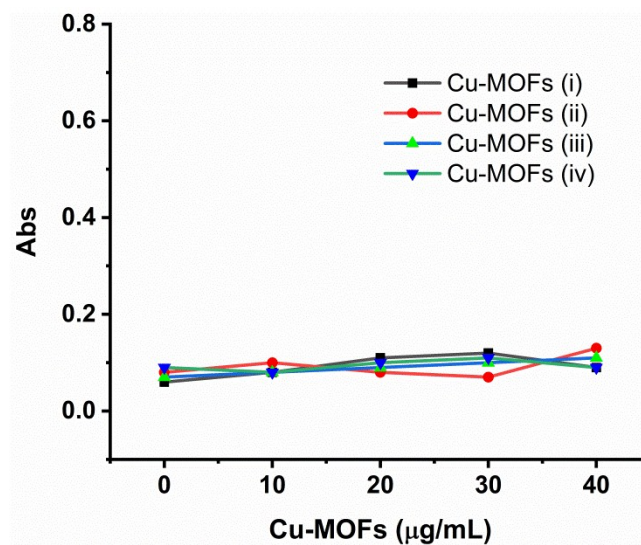

**Figure S9.** Study of oxidase-like properties of Cu-MOFs. Assay conditions: 0.5 mM TMB and different concentrations of Cu-MOFs (pH 7.0).

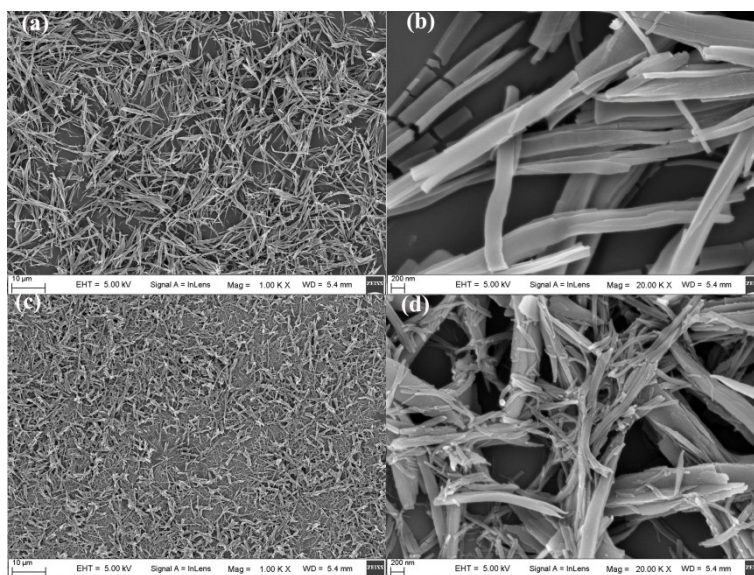

**Figure S10.** SEM images of Cu-MOFs (ii) before (a), (b) and after (c), (d) the catalytic reaction.



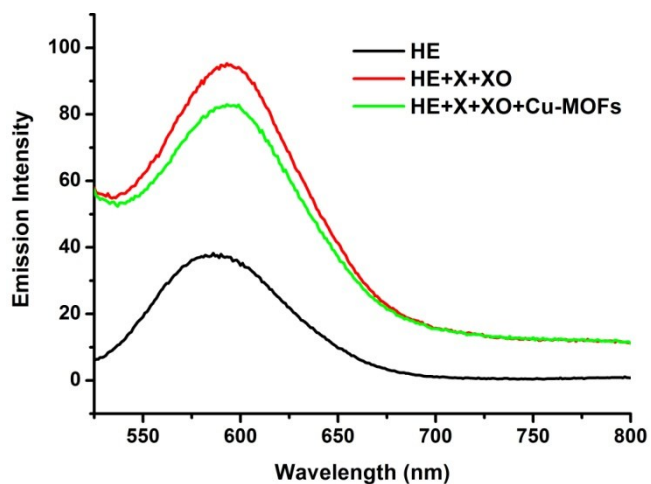

**Figure S11.** Effects of Cu-MOFs (ii) on the changes of  $\cdot\text{O}_2^-$  using dihydroethidium as the fluorescence probe. Assay conditions: 50  $\mu\text{M}$  dihydroethidium, 1 mM X, 1 U/mL XO, 0.1 mM DTPA, 30  $\mu\text{g/mL}$  Cu-MOFs (ii), excitation wavelength, 480 nm.

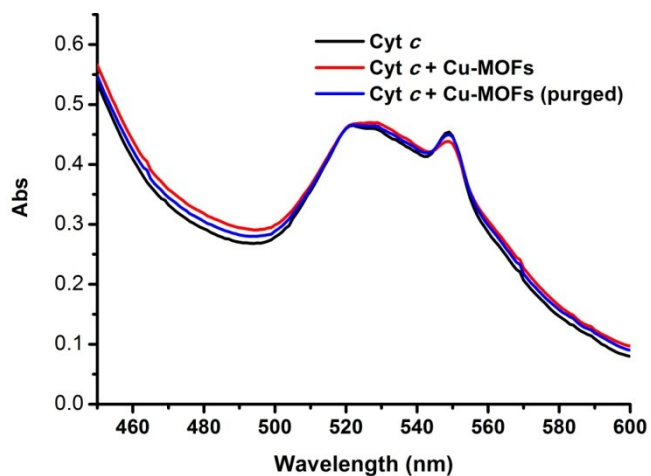

**Figure S12.** UV-vis spectrum of Cyt *c*, Cyt *c* reacted with Cu-MOFs (ii) and Cyt *c* reacted with Cu-MOFs (ii) under deoxygenated condition. Assay conditions: 0.5 mg/ mL Cyt *c*, 20  $\mu\text{g/mL}$  Cu-MOFs (ii).

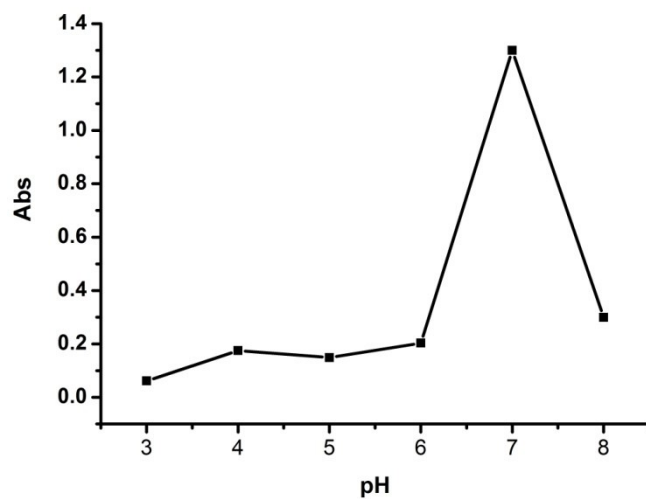

**Figure S13.** Effect of pH on catalytic activity of the Cu-MOFs (ii). Assay conditions: 0.5 mM TMB, 4 mM H<sub>2</sub>O<sub>2</sub>, 20 µg/mL Cu-MOFs (ii), 5 min.

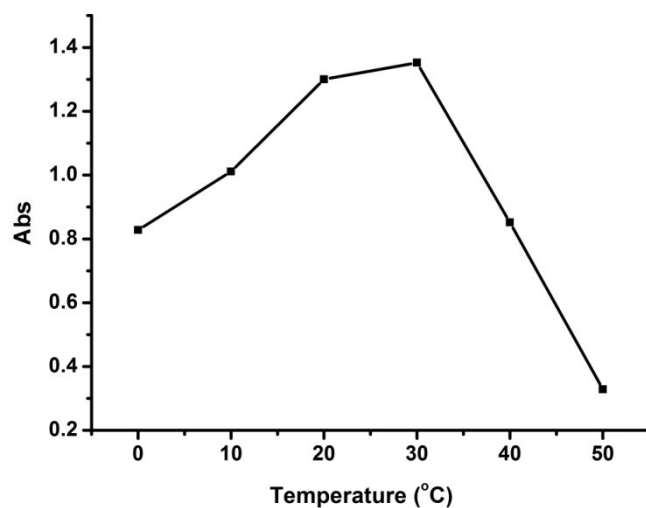

**Figure S14.** Dependence of the catalytic activity of Cu-MOFs (ii) on temperature. Assay conditions: 0.5 mM TMB, 4 mM H<sub>2</sub>O<sub>2</sub>, pH 7.0, 5 min.

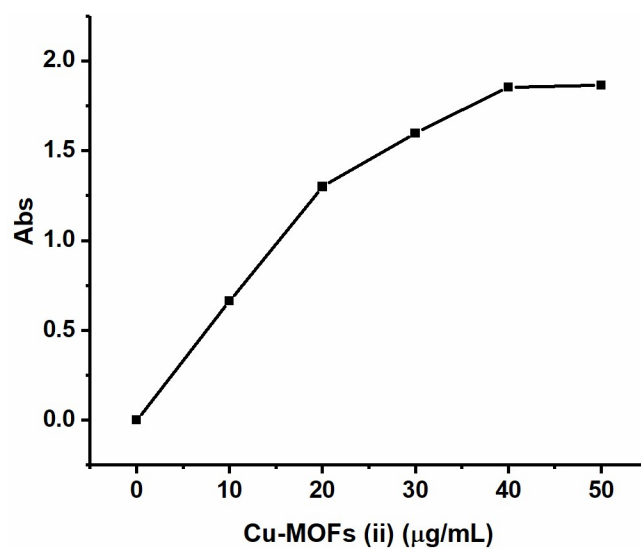

**Figure S15.** Effect of the amount of Cu-MOFs (ii). Assay conditions: 0.5 mM TMB, 4 mM H<sub>2</sub>O<sub>2</sub>, pH 7.0, 5 min.

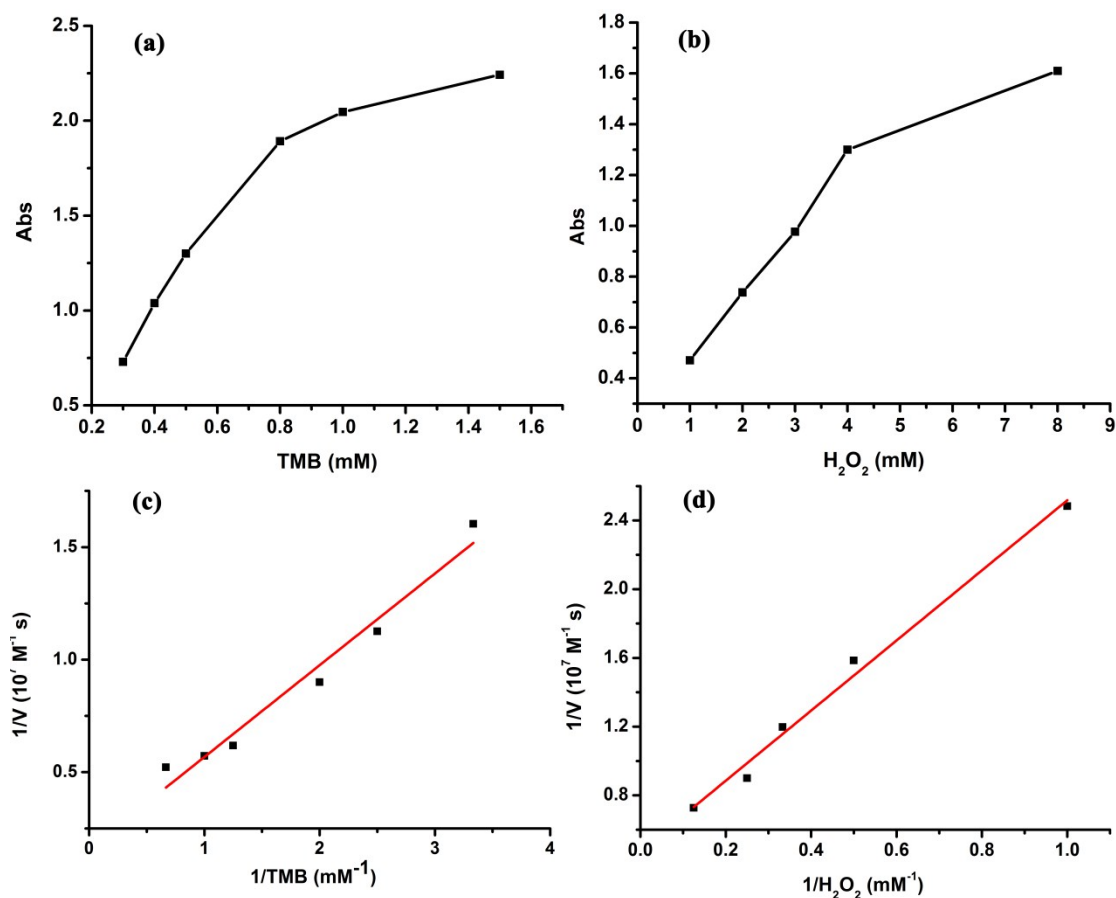

**Figure S16.** Steady-state kinetics measurements of the Cu-MOFs (ii). (a) The concentration of H<sub>2</sub>O<sub>2</sub> was 5 mM and the TMB concentration varied. (b) The concentration of TMB was 0.5 mM and the H<sub>2</sub>O<sub>2</sub> concentration varied. (c) Double reciprocal plots of activity of Cu-MOFs (ii) with the concentration of TMB varied. The TMB concentration was 0.3, 0.4, 0.5, 0.8, 1.0 and 1.5 mM, respectively. (d) Double reciprocal plots of activity of Cu-MOFs (ii) with the concentration of H<sub>2</sub>O<sub>2</sub> varied. The H<sub>2</sub>O<sub>2</sub> concentration was 1, 2, 3, 4 and 8 mM, respectively.

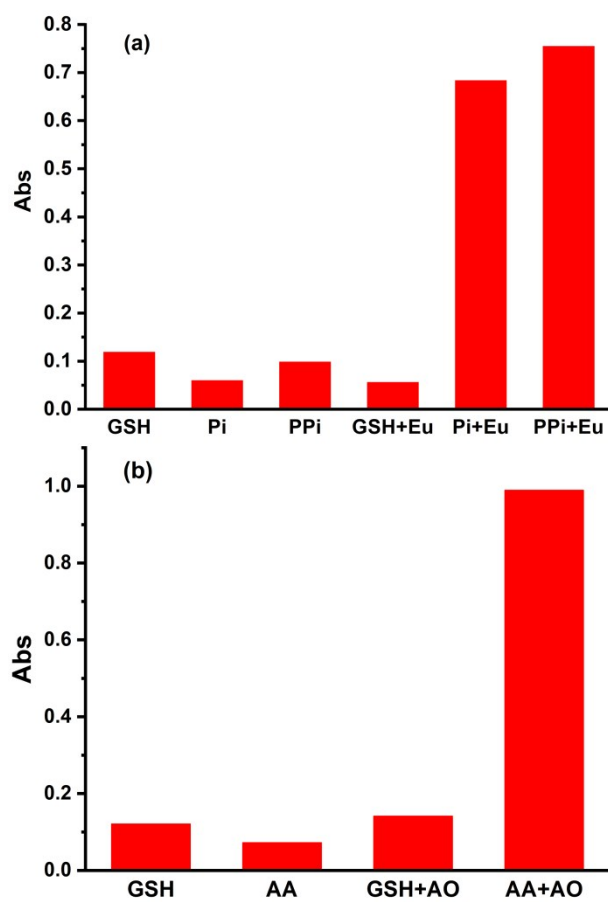

**Figure S17.** The effects of (a) Phosphate species or (b) ascorbic acid on GSH detection. Assay conditions: 0.5 mM TMB, 4 mM H<sub>2</sub>O<sub>2</sub>, 20 µg/mL Cu-MOFs (ii), 20 µM Eu<sup>3+</sup>, 1 U/mL AO, 5 min.

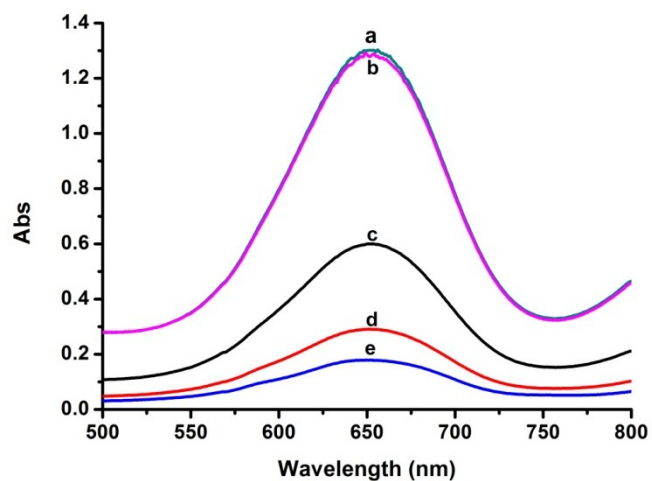

**Figure S18** GSH detection in serum. line a: TMB+H<sub>2</sub>O<sub>2</sub>+ Cu-MOFs (ii); line b: TMB+H<sub>2</sub>O<sub>2</sub>+ Cu-MOFs (ii)+serum; line b: TMB+H<sub>2</sub>O<sub>2</sub>+ Cu-MOFs (ii)+serum+25  $\mu$ M GSH; line c: TMB+H<sub>2</sub>O<sub>2</sub>+ Cu-MOFs (ii)+serum+55  $\mu$ M GSH; line d: TMB+H<sub>2</sub>O<sub>2</sub>+ Cu-MOFs (ii)+serum; line e: TMB+H<sub>2</sub>O<sub>2</sub>+ Cu-MOFs(ii)+serum+75  $\mu$ M GSH.

**Table S1.** Comparison of the BET surface areas and pore volumes of different Cu-MOFs.

|                                         | (i)  | (ii) | (iii) | (iv) |
|-----------------------------------------|------|------|-------|------|
| BET Surface Area<br>(m <sup>2</sup> /g) | 5.09 | 1.81 | 14.07 | 8.56 |

**Table S2.** Zeta potential of the obtained Cu-MOFs.

|               | 1     | 2     | 3     | average |
|---------------|-------|-------|-------|---------|
| Cu-MOFs (i)   | -1.96 | -2.04 | -1.9  | -1.96   |
| Cu-MOFs (ii)  | -2.6  | -1.71 | -2.1  | -2.13   |
| Cu-MOFs (iii) | 5.56  | 4.96  | 4.6   | 5.04    |
| Cu-MOFs (iv)  | -20.6 | 4.96  | -19.7 | -11.78  |

**Table S3.** Comparison of the Michaelis-Menten constant ( $K_m$ ) and maximum reaction rate ( $V_m$ ).

| catalyst     | $K_m$ (mM) |                               | ref       |
|--------------|------------|-------------------------------|-----------|
|              | TMB        | H <sub>2</sub> O <sub>2</sub> |           |
| Catalase     | -          | 4.1                           | 37        |
| Cu-MOFs (ii) | 2.56       | 4.34                          | This work |

**Table S4.** Absorbance of six blank samples and calculated Y axes signals

| i                   | 1         | 2       | 3        | 4       | 5        | 6        |
|---------------------|-----------|---------|----------|---------|----------|----------|
| $A_i$               | 1.2997    | 1.2883  | 1.3021   | 1.2781  | 1.3103   | 1.3142   |
| $y_i = \log(A_0/A)$ | -0.000308 | 0.00352 | -0.00111 | 0.00697 | -0.00384 | -0.00513 |

Note: i represented the number of six blank samples, and  $A_0$  was the average of six absorbance values (652 nm). And the limit of detection of calculated as follows:

$$\sigma = \sqrt{\frac{1}{n-1} \sum_{i=1}^6 (y_i - y_{aver})^2} = 0.00454$$
$$\text{LOD} = 3 \times 0.00454 / 0.014 = 0.97 \text{ } (\mu\text{M})$$
